# Supplementary material for: Mediation analysis to understand genetic relationships between habitual coffee intake and gout
Source: PubMed Central journal article supplement (PMC6034252; doi:10.1186/s13075-018-1629-5), 2018-07-05

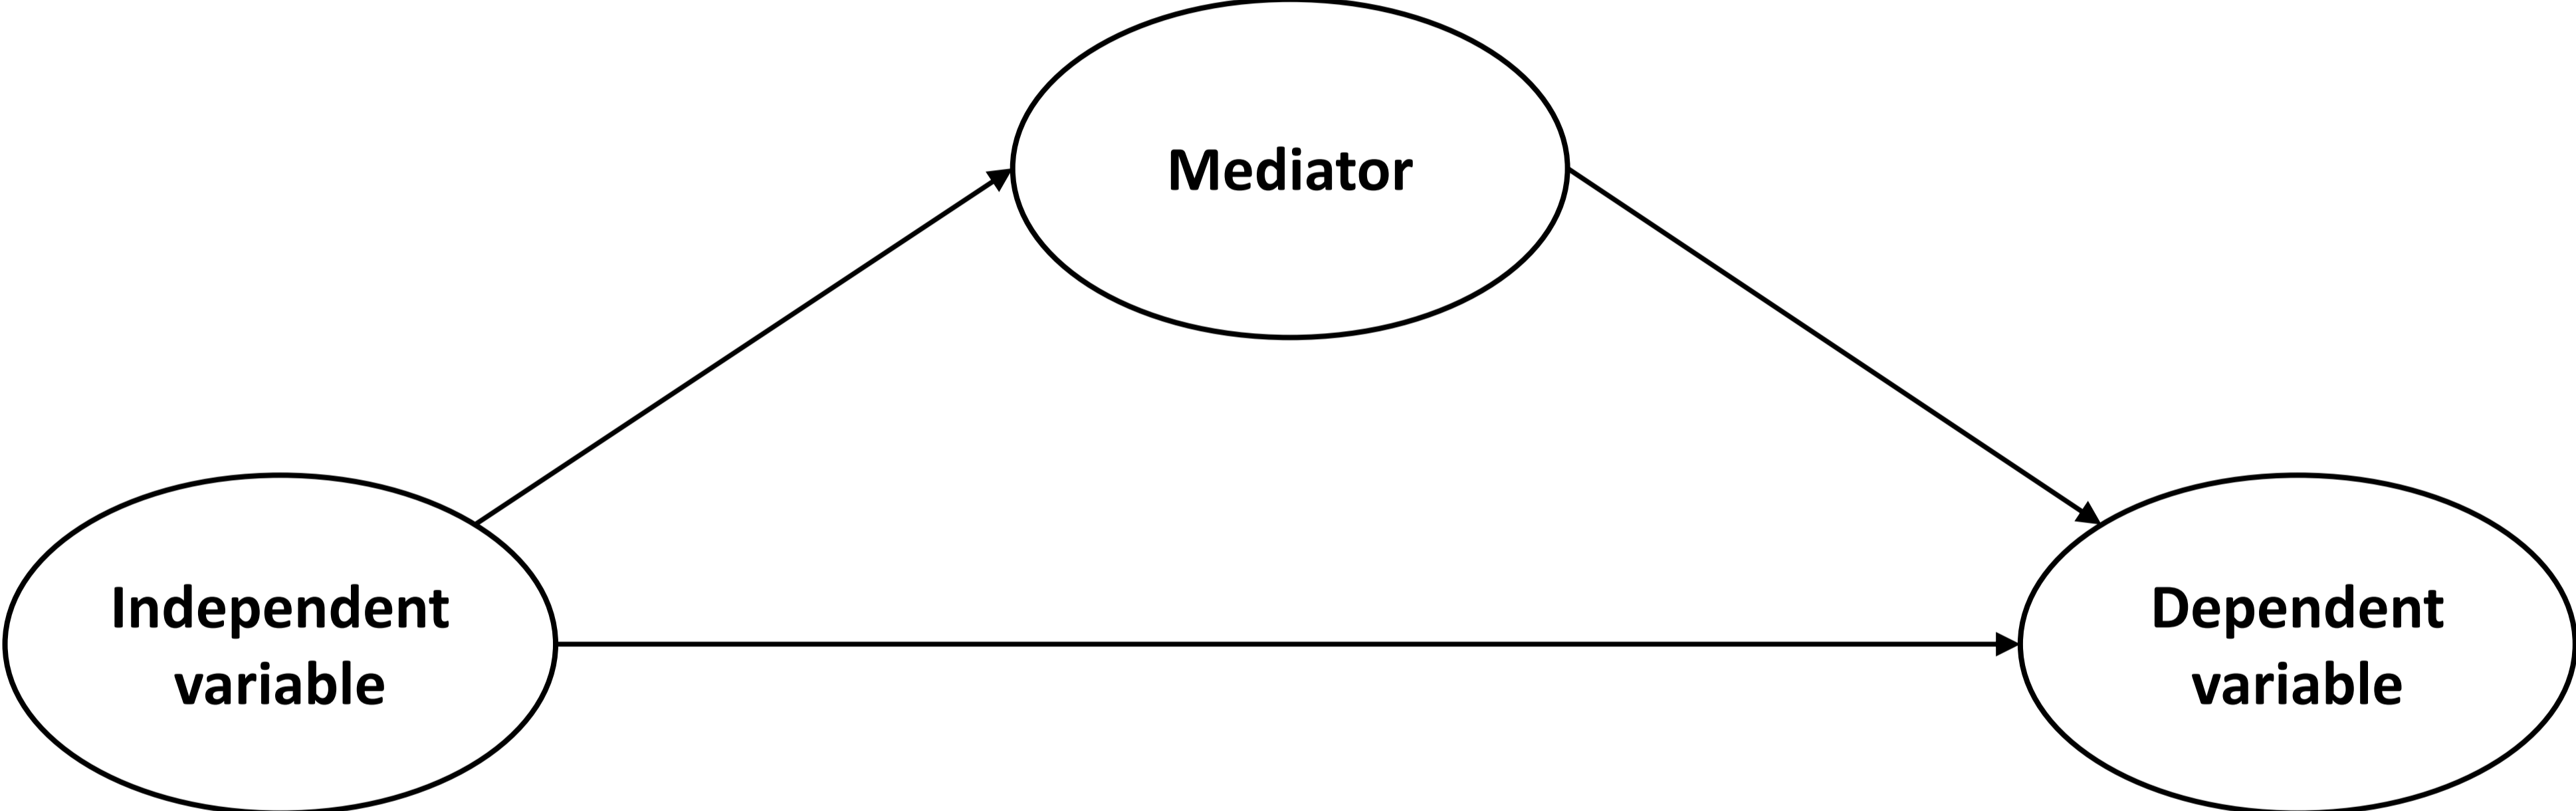

Supplement: 13075_2018_1629_MOESM3_ESM.pdf [file 13075_2018_1629_MOESM3_ESM.pdf]
